# Supplementary material for: Composite of few-layer MoO3nanosheets with graphene as a high performance anode for sodium-ion batteries
Source: Royal Society of Chemistry journal article supplement (doi:10.1039/c6ta02561g), 2016-01-01
Supplement: c6ta02561g1.pdf [file c6ta02561g1.pdf]

## Supporting Information

### Composite of Few-layer MoO<sub>3</sub> Nanosheets with Graphene as a High Performance Anode for Sodium-ion Batteries

M. B. Sreedhara,<sup>a</sup> A. L. Santhosha,<sup>b</sup> Aninda J. Bhattacharyya,<sup>\*b</sup> and C. N. R. Rao<sup>\*a,b</sup>

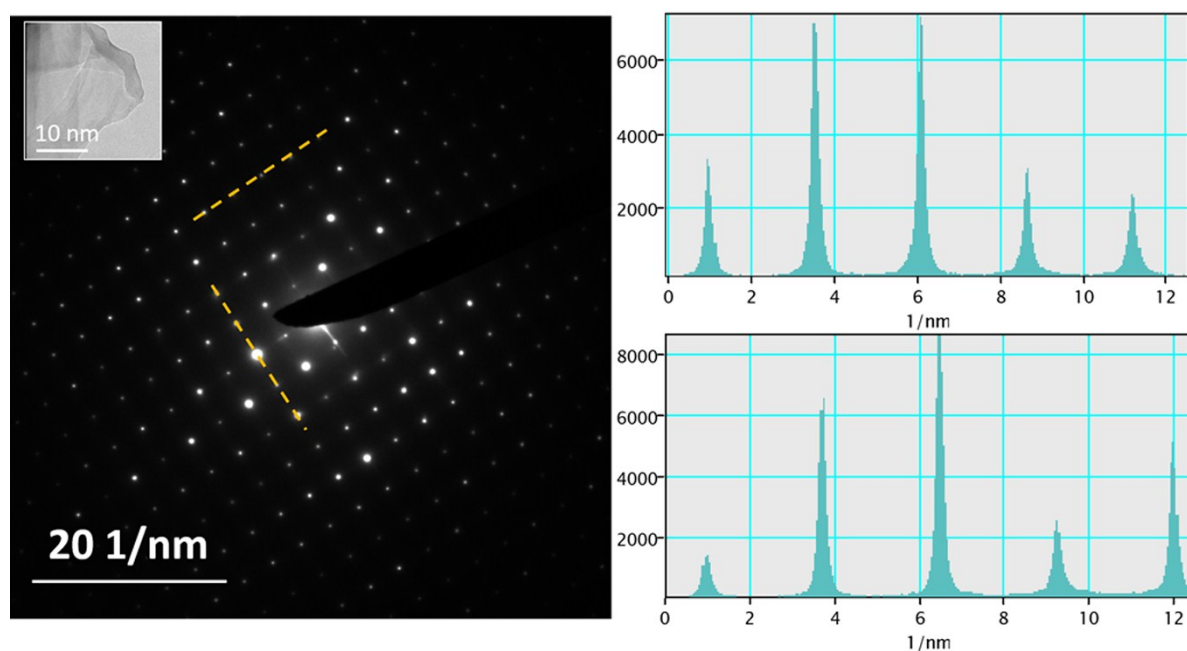

**Fig. S1** Selected area electron diffraction (SAED) pattern of few-layer MoO<sub>3</sub> nanosheet (inset) showing orthorhombic patterns and corresponding line profile.

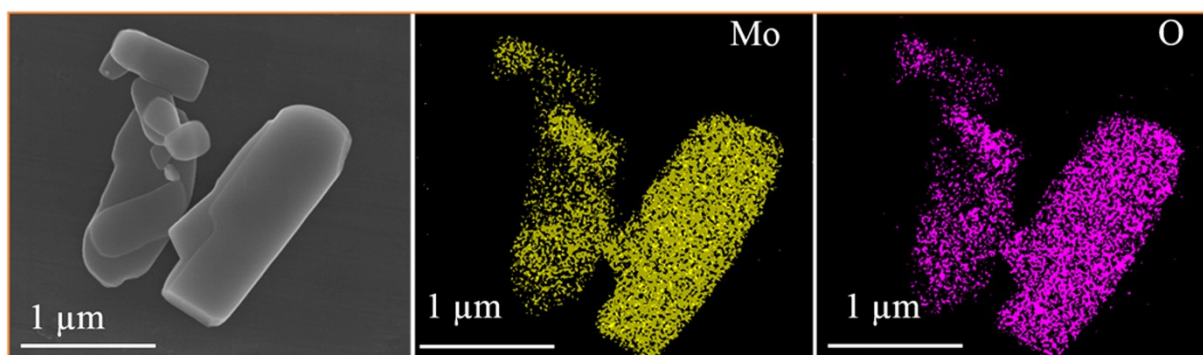

**Fig. S2** FESEM image of few-layer MoO<sub>3</sub> and corresponding elemental mapping of Mo (yellow) and O (pink).

Fig. S2 shows the EDAX elemental mapping of few-layer MoO<sub>3</sub> nanosheets obtained in FESEM. We have chosen the large area to make sure the distribution of Mo and O. The Mo and O are uniformly distributed throughout the nanosheets reveals the wide range of homogeneous composition.

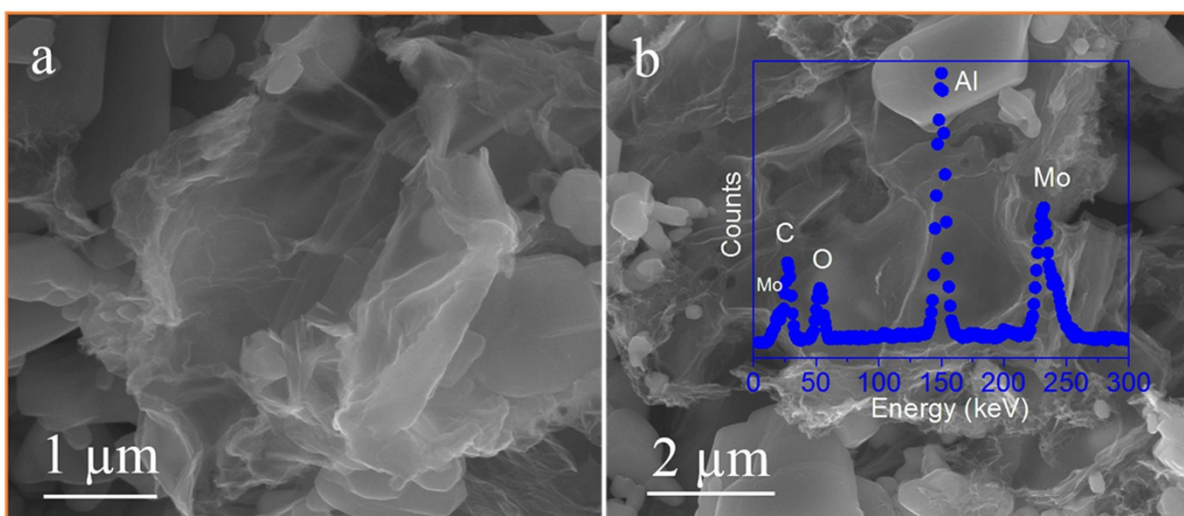

**Fig. S3** FESEM images of few-layer MoO<sub>3</sub>-rGO composite (10 wt%). Inside of (b) shows EDAX spectra corresponding Mo, O and C.

Fig. S3 shows the FESEM images of the few-layer MoO<sub>3</sub>-rGO composite (10wt%). The samples shows uniform coverage of rGO on the MoO<sub>3</sub> flakes this helps in the conductivity of the sample. EDAX spectra shows the peaks corresponds to Mo, O as well as C which confirms the composites are very uniform and homogeneous. The strong Al peak in EDAX spectrum corresponds to the substrate. The samples are drop coated on Al substrate for FESM analysis

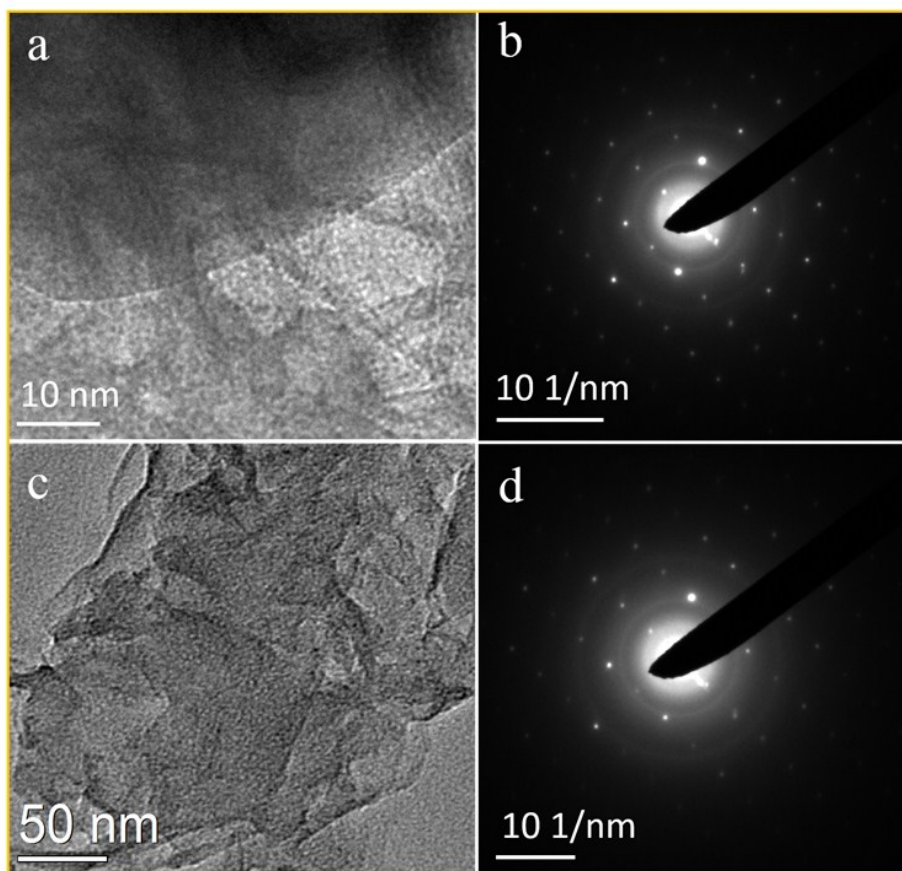

**Fig. S4** TEM images of Few-layer MoO<sub>3</sub>-rGO composite (a, c) and corresponding electron diffraction patterns (b, d).

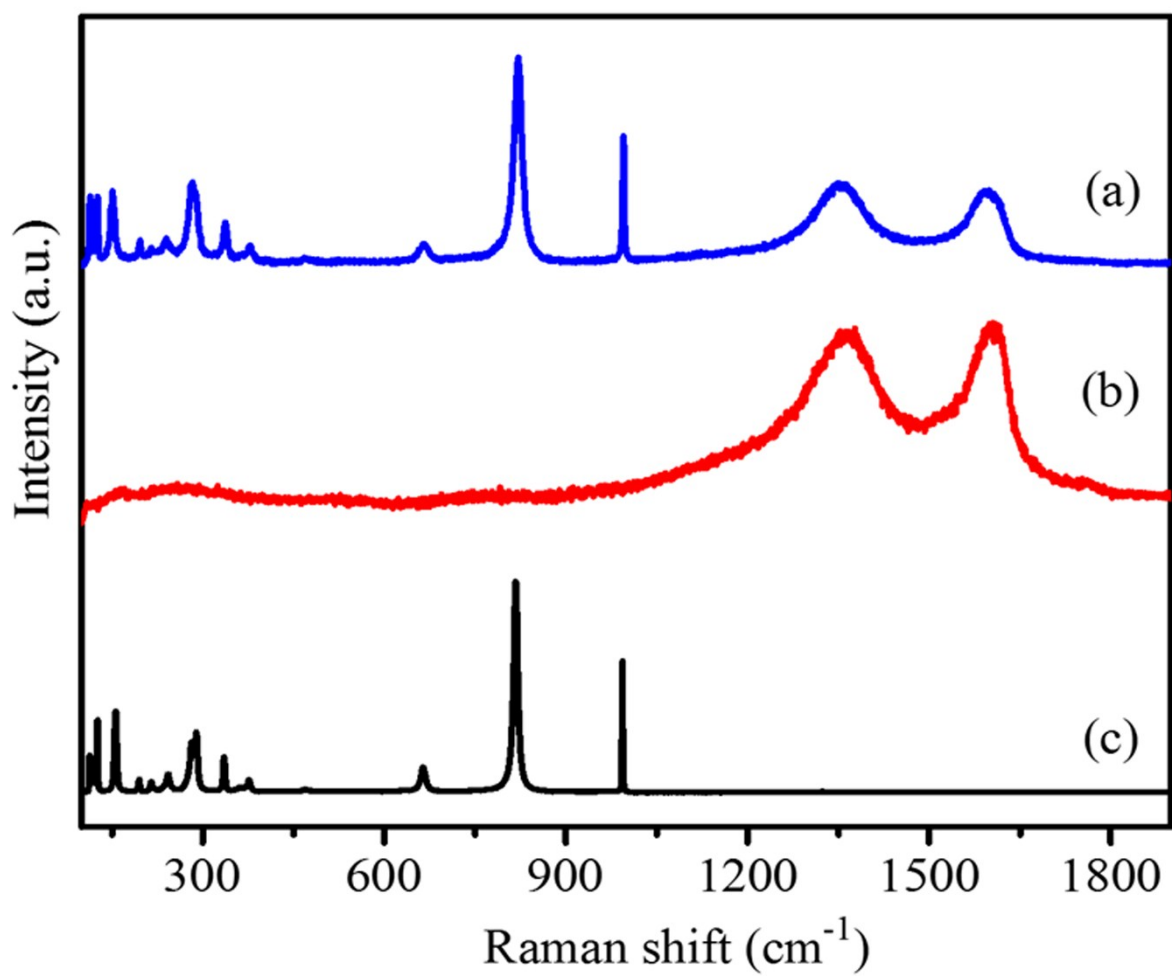

**Fig. S5** Raman spectra of **(a)** MoO<sub>3</sub>-rGO composite (10 wt%), **(b)** rGO and **(c)** few-layer MoO<sub>3</sub>.

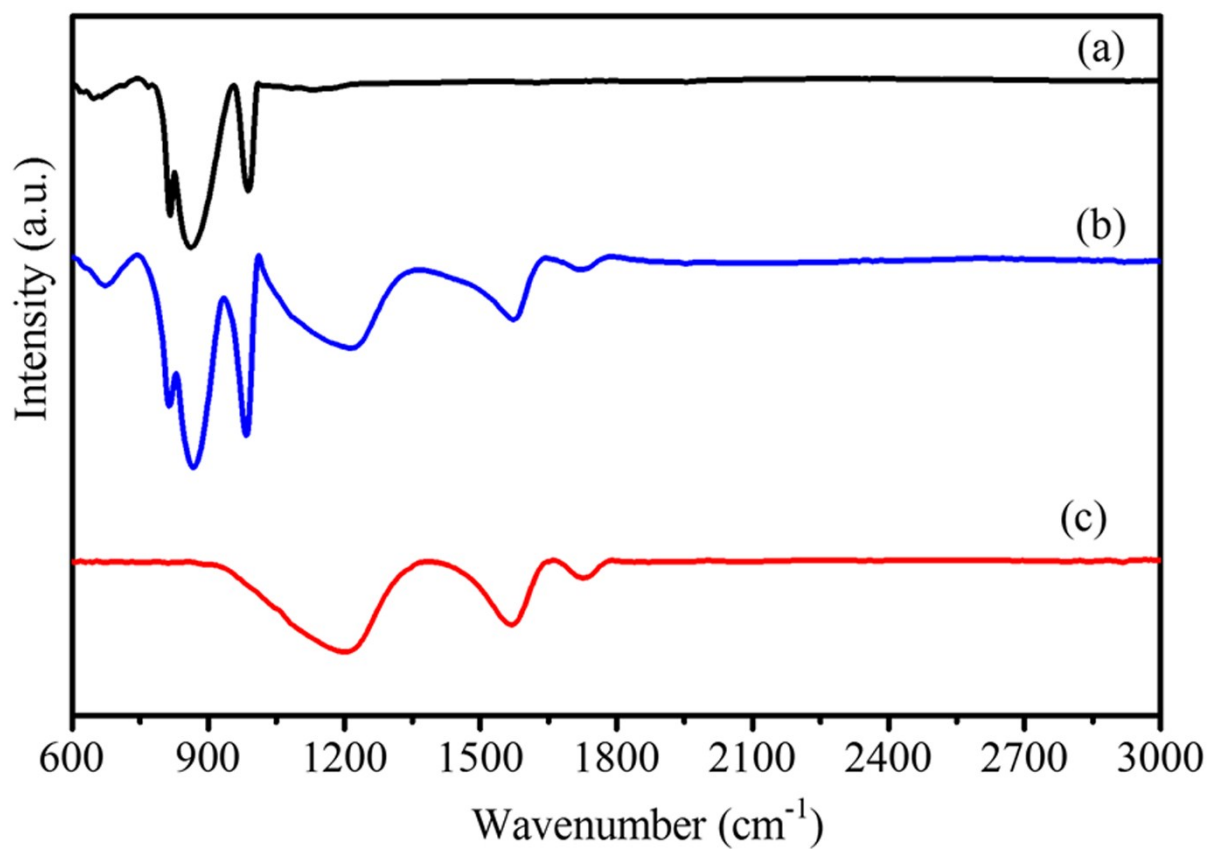

**Fig. S6** Fourier transform infrared spectrum of (a) few-layer MoO<sub>3</sub>, (b) few-layer MoO<sub>3</sub>-rGO composite (10 wt%) and (c) rGO.

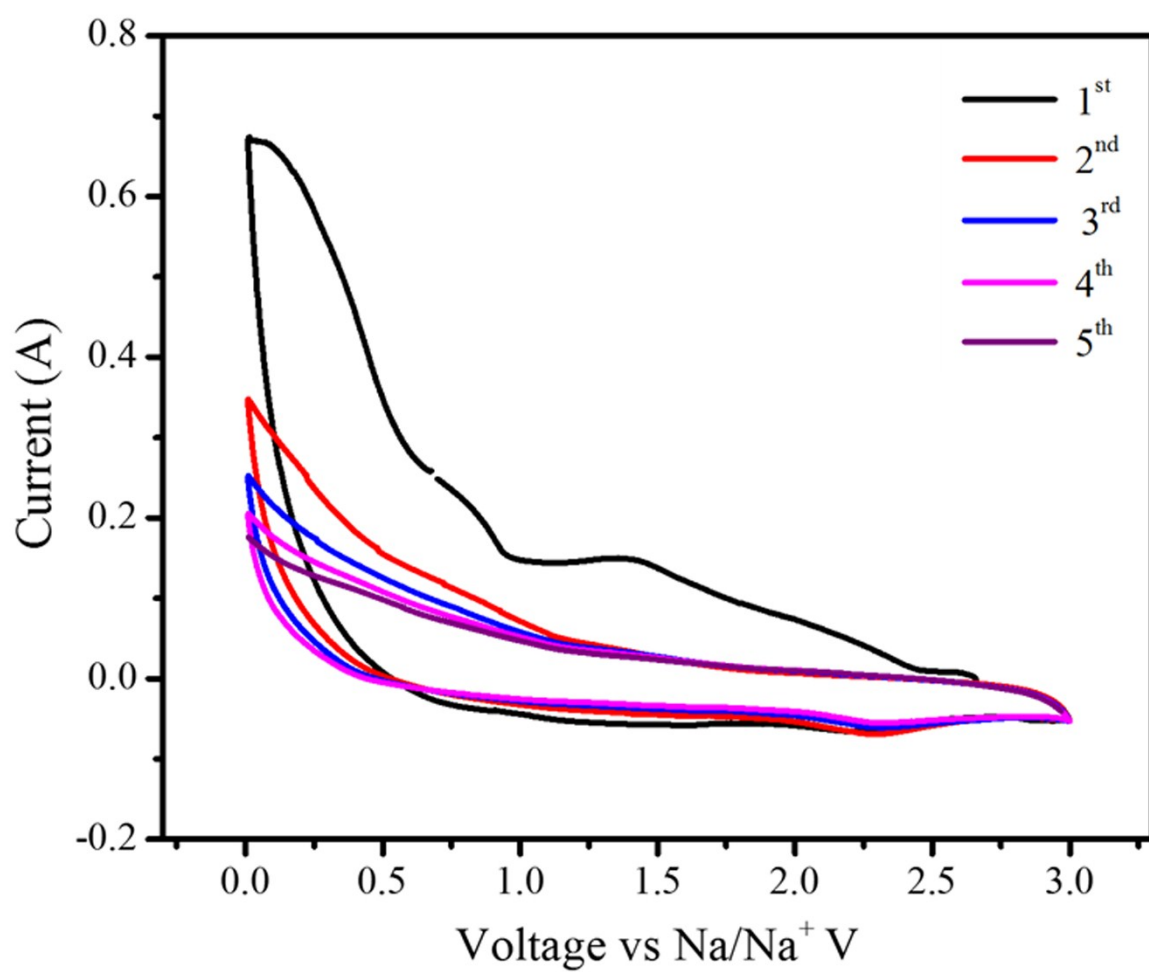

**Fig. S7** Cyclic voltammetry for few-layer MoO<sub>3</sub>-rGO composite (10wt%).

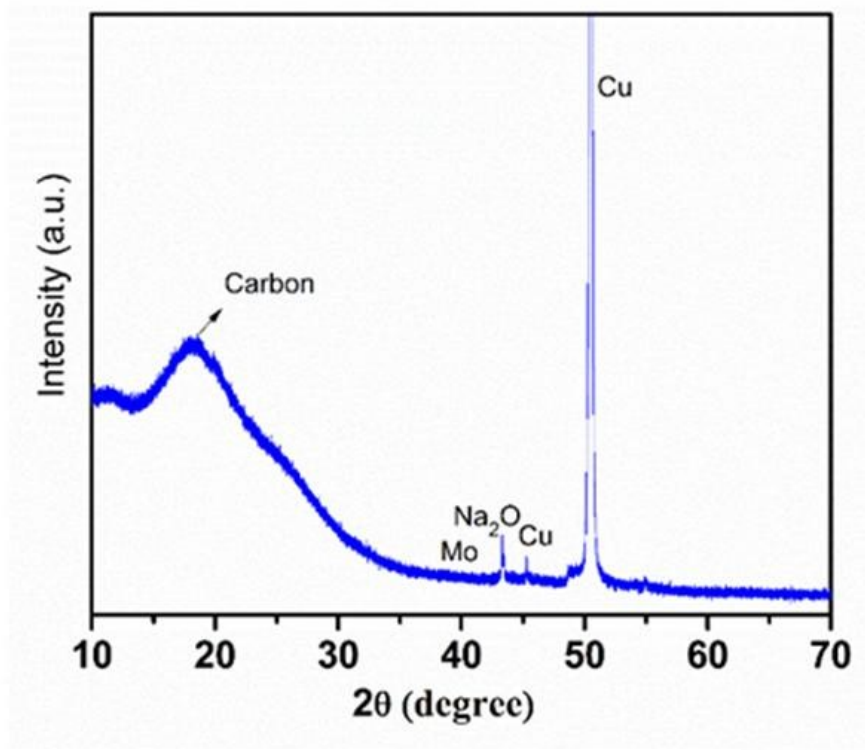

**Figure S8:** *ex-situ* XRD of the MoO<sub>3</sub>-rGO electrode after 1<sup>st</sup> discharge.



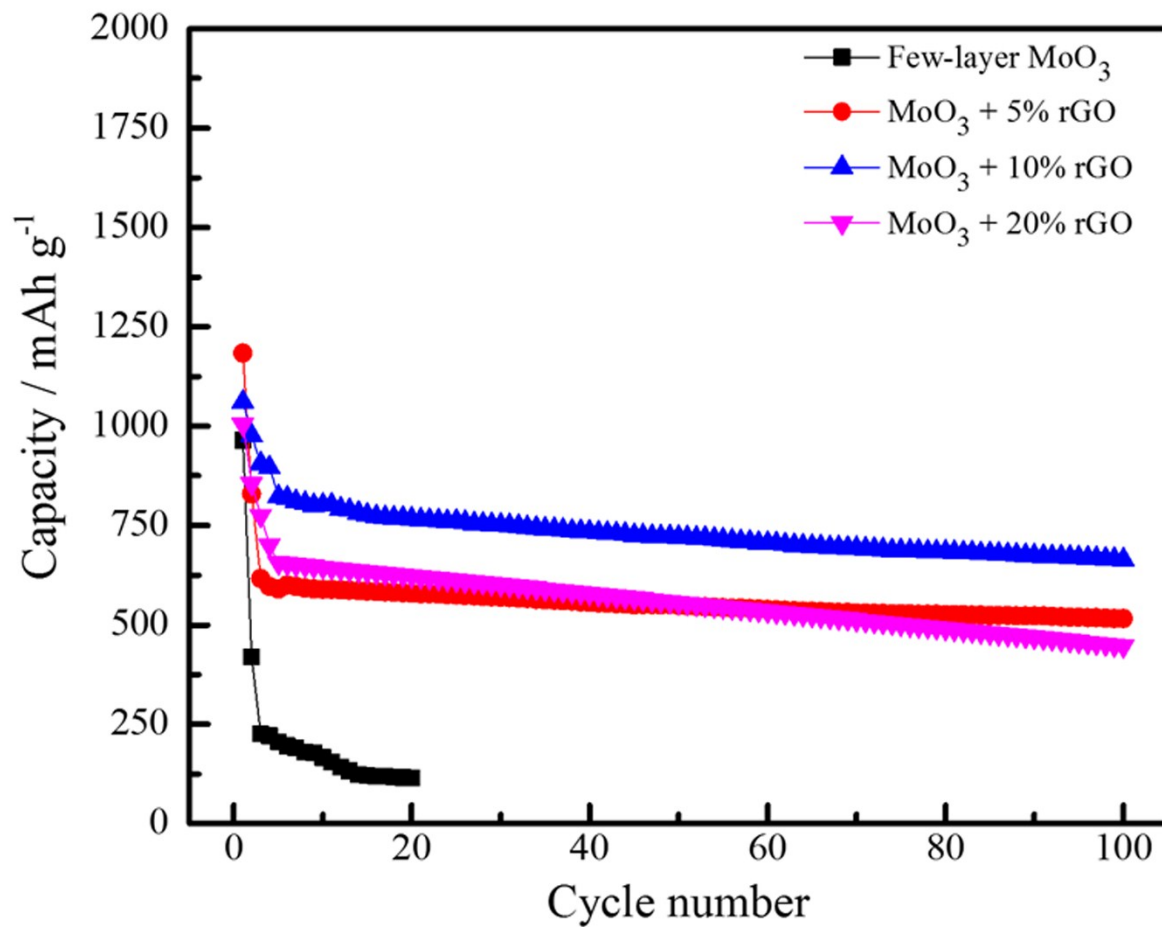

**Fig. S9** Na-discharge specific capacity of few-layer MoO<sub>3</sub>-rGO composites (5-20 wt%) and few-layer MoO<sub>3</sub>.

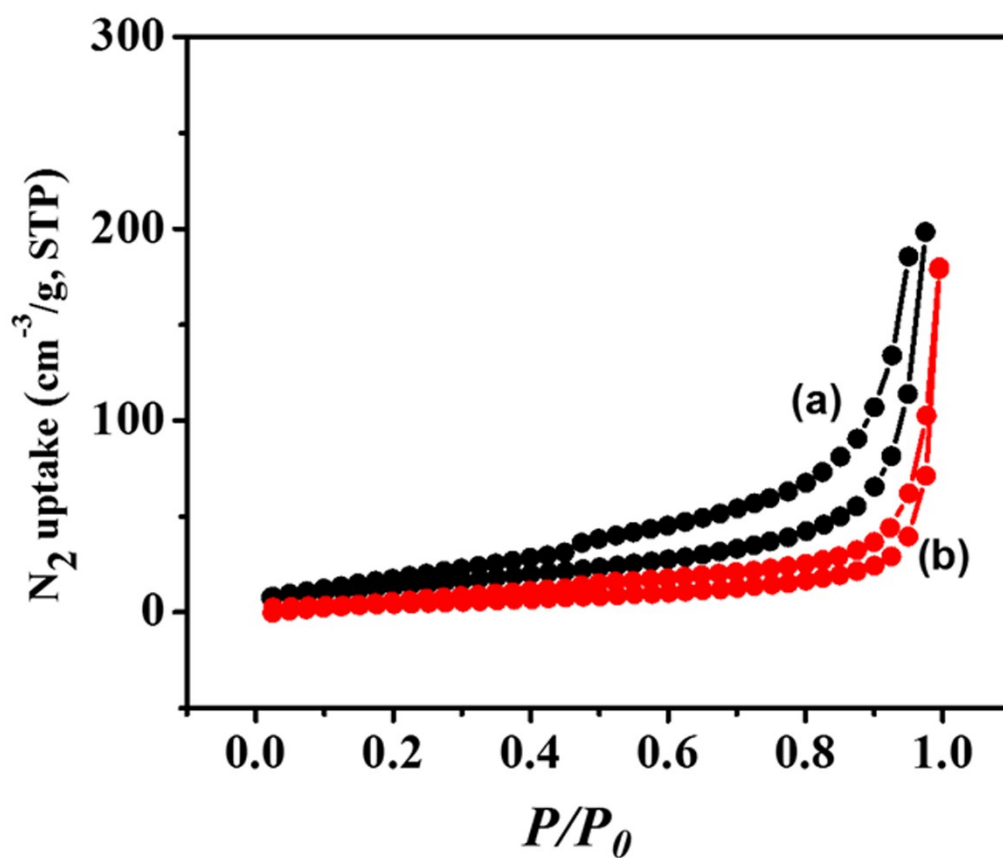

**Fig. S10** N<sub>2</sub> sorption profile of (a) few-layer MoO<sub>3</sub>-rGO (10 wt%) composite and (b) few-layer MoO<sub>3</sub>.

Nitrogen adsorption-desorption isotherm data of few-layer MoO<sub>3</sub> and MoO<sub>3</sub>-rGO composites recorded at 77K are shown in Fig. S9. The isotherm exhibits type-3 behavior with H3 type hysteresis loop. The Brunauer-Emmet-Teller (BET) surface areas of few-layer MoO<sub>3</sub> and MoO<sub>3</sub>-rGO composites are 42 and 58 m<sup>2</sup>g<sup>-1</sup> respectively.
